# Supplementary material for: Early HAART Initiation May Not Reduce Actual Reproduction Number and Prevalence of MSM Infection: Perspectives from Coupled within- and between-Host Modelling Studies of Chinese MSM Populations
Source: PubMed Central journal article supplement (PMC4773120; doi:10.1371/journal.pone.0150513), 2016-03-01
Supplement: pone.0150513.s001.pdf [file pone.0150513.s001.pdf]

S1 File. Effect of parameter values on HIV progression in vivo.

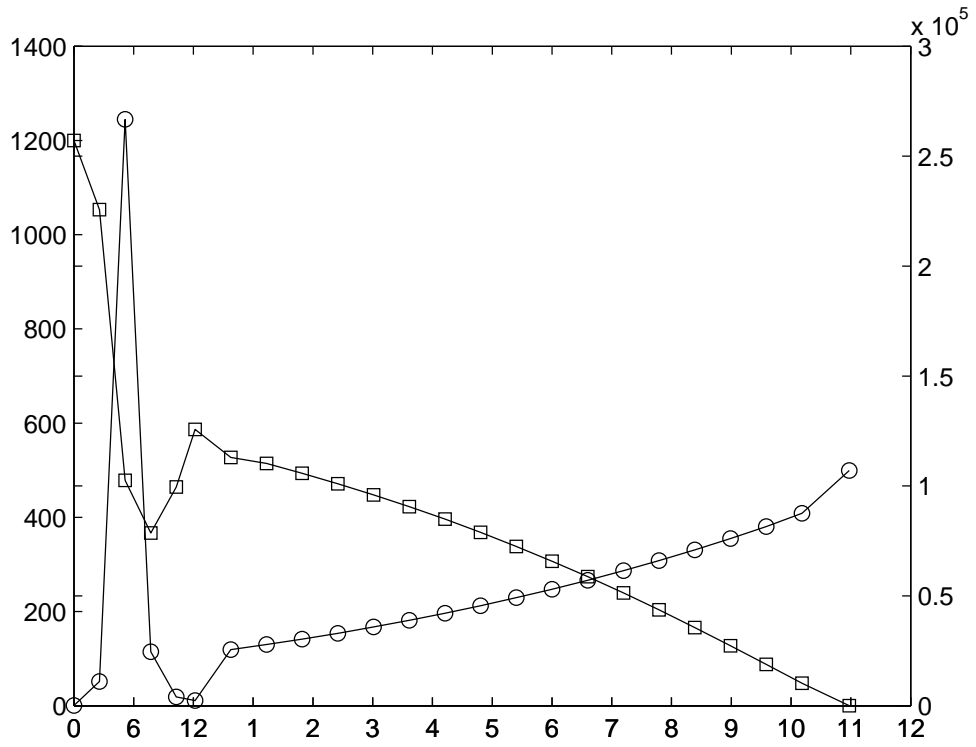

**Figure A.** A simulation of typical course of human immunodeficiency virus infection: CD4+ T cells(—□) and viral load (—○).  $\beta_k = 3400, \alpha_k = 1.1, \beta_\lambda = 5000, \alpha_\lambda = 0.04, T_m = 11 \times 365$ .

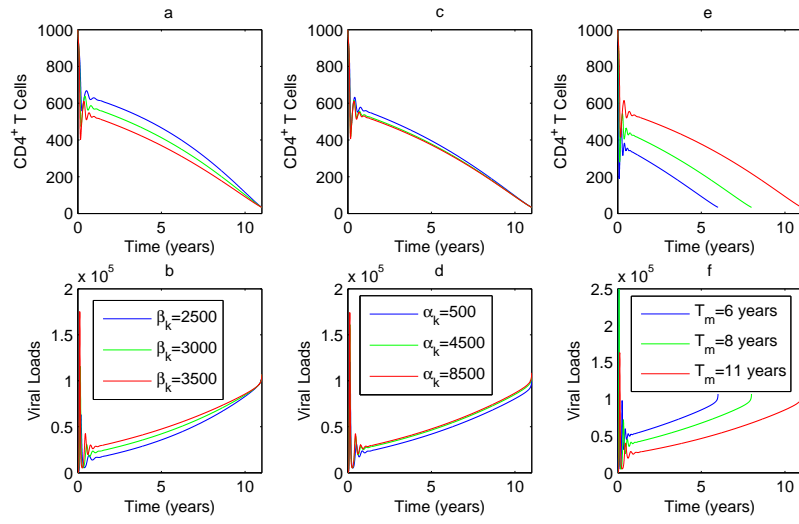

**Figure B.** Simulations of HIV disease progressions with different shape ( $\alpha_k$ ), scale ( $\beta_k$ ) and location parameters ( $T_m$ ).  $\beta_k = 3400$ ,  $\alpha_k = 1.1$ ,  $\beta_\lambda = 5000$ ,  $\alpha_\lambda = 0.04$ ,  $T_m = 11 \times 365$ .

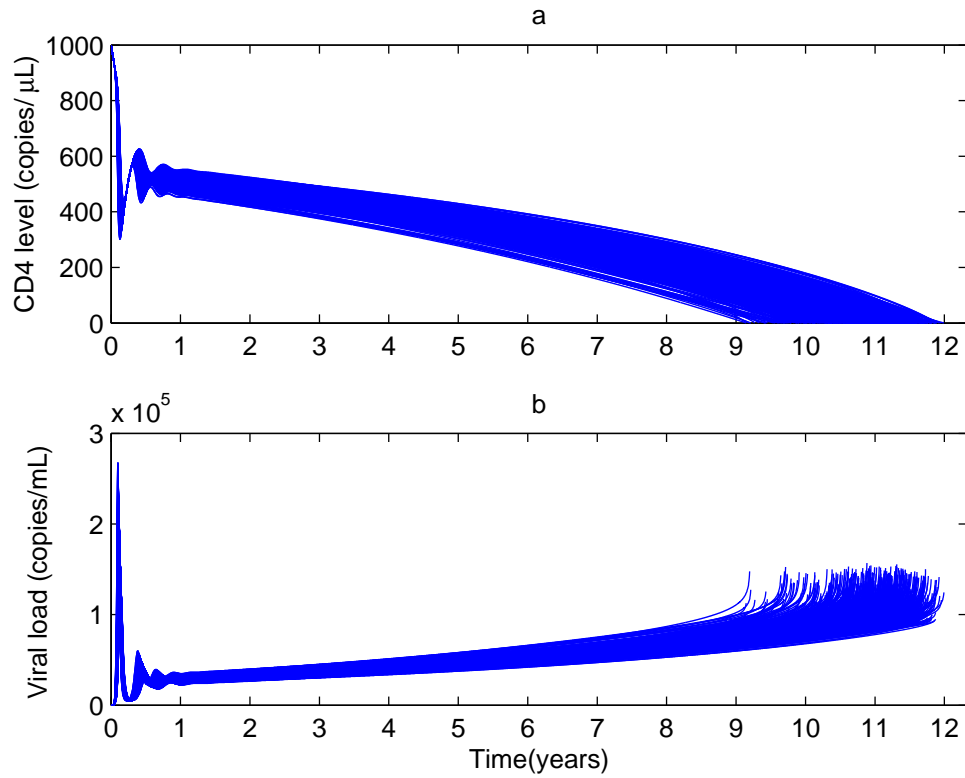

**Figure C.** 1000 simulations of typical course of human immunodeficiency virus infection without ART.

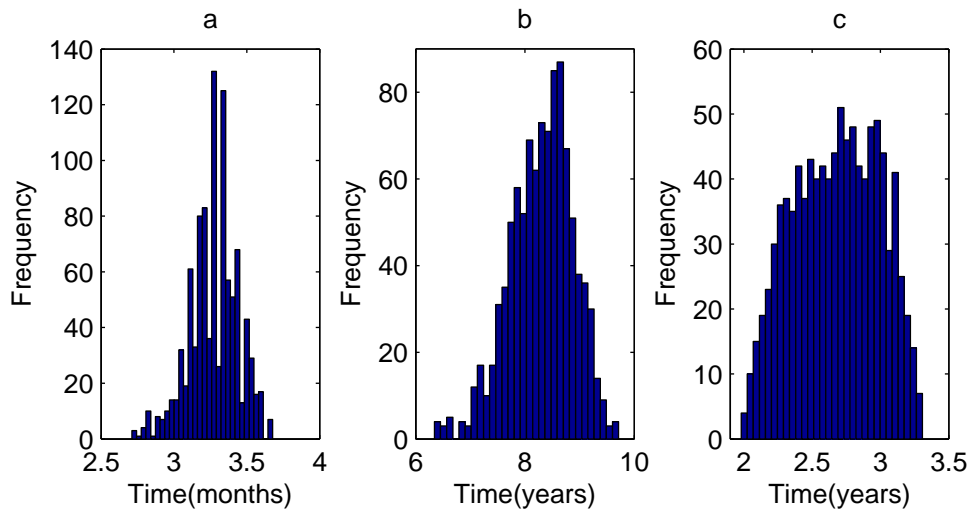

**Figure D.** Duration of different infection stages. a. duration of primary stage; b. duration of asymptomatic stage; c. duration of AIDS stage.

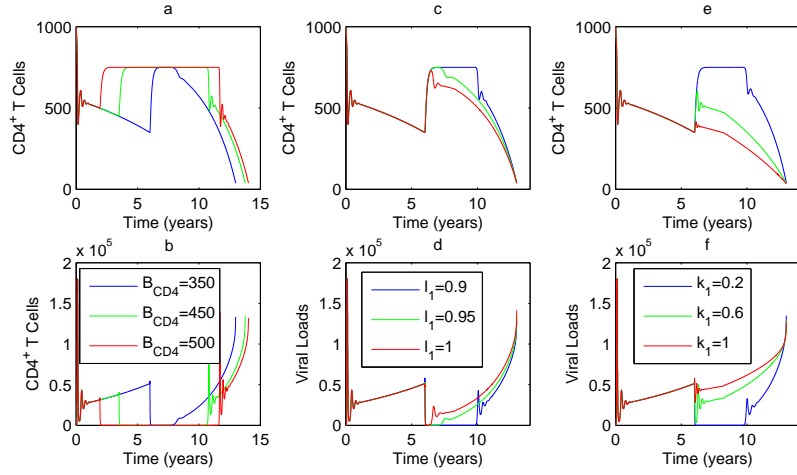

**Figure E.** Effects of key factors on the HIV disease progression. a-b. Baseline CD4<sup>+</sup> cell counts with  $B_{CD4} = 350, 450, 500$ ; c-d.  $l_1 = 0.9, 0.95, 1$ ,  $l_1 = l_2$ ; e-f.  $k_1 = 0.2, 0.6, 1$ ,  $k_1 = k_2$ .  $\beta_k = 3400, \alpha_k = 1.1, \beta_\lambda = 5000, \alpha_\lambda = 0.04, T_m = 11$  years,  $\tau_m = 35$  years.

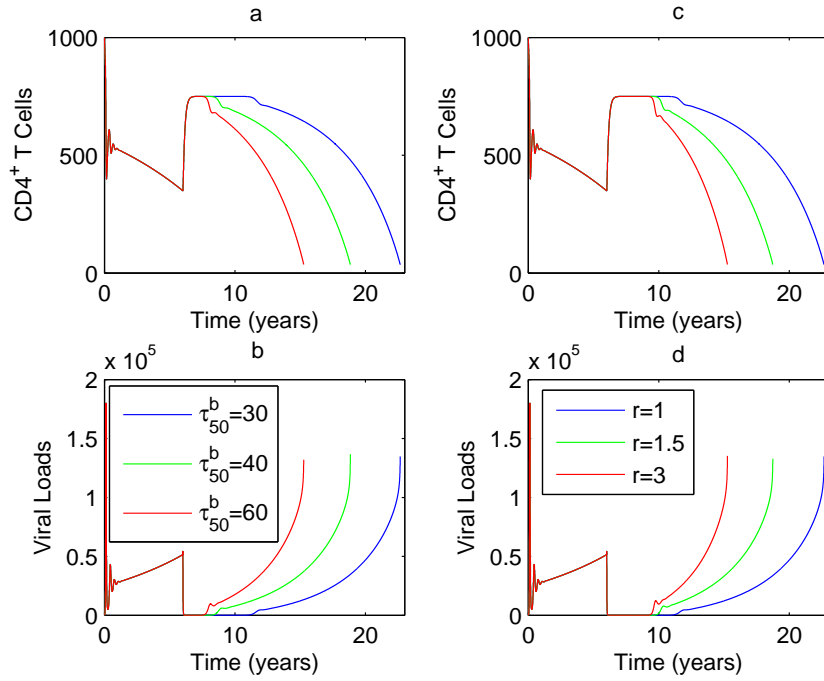

**Figure F.** Effects of key factors on the HIV disease progression. a-b.  $\tau_{50}^b = 30, 40, 60$ ,  $r = 1$ ; c-d.  $r = 1, 1.5, 3$ ,  $\tau_{50}^b = 30$ .  $\beta_k = 3400, \alpha_k = 1.1, \beta_\lambda = 5000, \alpha_\lambda = 0.04, T_m = 11$  years,  $\tau_m = 35$  years.

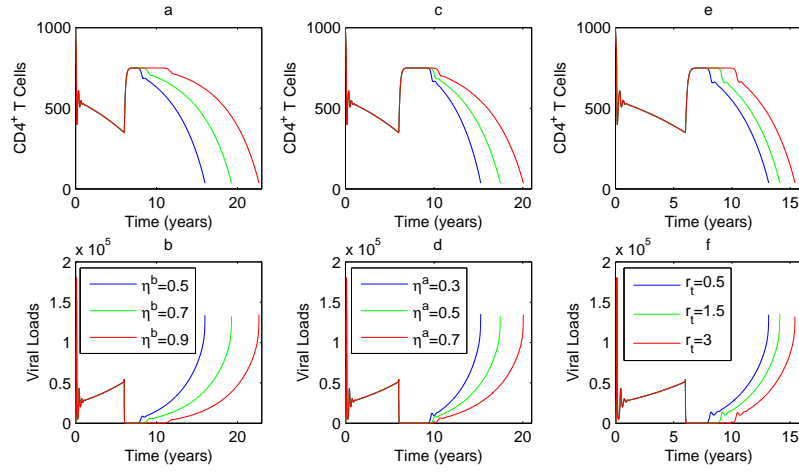

**Figure G.** Effects of key factors on the HIV disease progression. a-b.  $\eta^b = 0.5, 0.7, 0.9$ ,  $\eta^a = \eta^b$ ; c-d.  $\eta^a = 0.3, 0.5, 0.7$ ,  $\eta^b = 0.9$ ; e-f.  $r_t = 0.5, 1.5, 3$ .  $\beta_k = 3400$ ,  $\alpha_k = 1.1$ ,  $\beta_\lambda = 5000$ ,  $\alpha_\lambda = 0.04$ ,  $T_m = 11$  years,  $\tau_m = 35$  years.
