# Supplementary material for: Early HAART Initiation May Not Reduce Actual Reproduction Number and Prevalence of MSM Infection: Perspectives from Coupled within- and between-Host Modelling Studies of Chinese MSM Populations
Source: PubMed Central journal article supplement (PMC4773120; doi:10.1371/journal.pone.0150513), 2016-03-01
Supplement: pone.0150513.s002.pdf [file pone.0150513.s002.pdf]

**S2 File. Parameter values for within-host model**

**Table A.** Parameter values for within-host model

| Parameter          | Definition                                                                                                     | Value/Range             |
|--------------------|----------------------------------------------------------------------------------------------------------------|-------------------------|
| $s$                | Rate of supply of CD4+T cell from precursors                                                                   | 15                      |
| $d$                | Death rate of uninfected CD4+ T cells                                                                          | $0.02 \text{ day}^{-1}$ |
| $\delta$           | Death rate of infected CD4+ cells                                                                              | $0.45 \text{ day}^{-1}$ |
| $c$                | Death or clearance rate of free virus                                                                          | $2.4 \text{ day}^{-1}$  |
| $k$                | Infection rate per virion before treatment                                                                     | $2.1818\text{e-}7$      |
| $k^b$              | Infection rate per virion after treatment<br>(before emergence of drug resistance )                            | $l_1 k$                 |
| $k^a$              | Infection rate per virion after treatment<br>(after emergence of drug resistance )                             | $l_2 k$                 |
| $\lambda$          | Number of free virus produced by lysing a CD4+ T cell before treatment                                         | 3928.6                  |
| $\lambda^b$        | Number of free virus produced by lysing a CD4+ T cell after treatment (before emergence of drug resistance )   | $l_1 \lambda$           |
| $\lambda^a$        | Number of free virus produced by lysing a CD4+ T cell after treatment (after emergence of drug resistance )    | $l_2 \lambda$           |
| $\beta_k$          | Scale parameter related to infection of target cells before treatment                                          | U[3300,3500]            |
| $\beta_k^b$        | Scale parameter related to infection of target cells after treatment<br>(before emergence of drug resistance ) | $k_1 \beta_k$           |
| $\beta_k^a$        | Scale parameter related to infection of target cells after treatment<br>(after emergence of drug resistance )  | $k_2 \beta_k$           |
| $\beta_\lambda$    | Scale parameter related to virus production before treatment                                                   | U[4000,6000]            |
| $\beta_\lambda^b$  | Scale parameter related to virus production after treatment<br>(before emergence of drug resistance )          | $\beta_\lambda$         |
| $\beta_\lambda^a$  | Scale parameter related to virus production after treatment<br>(after emergence of drug resistance )           | $\beta_\lambda$         |
| $\alpha_k$         | Shape parameter related to infection of target cells before treatment                                          | U[0.8,1.1]              |
| $\alpha_k^b$       | Shape parameter related to infection of target cells after treatment<br>(before emergence of drug resistance ) | $\alpha_k$              |
| $\alpha_k^a$       | Shape parameter related to infection of target cells after treatment<br>(after emergence of drug resistance )  | $\alpha_k$              |
| $\alpha_\lambda$   | Shape parameter related to virus production before treatment                                                   | U[0.01,1]               |
| $\alpha_\lambda^b$ | Shape parameter related to virus production after treatment<br>(before emergence of drug resistance )          | $\alpha_\lambda$        |
| $\alpha_\lambda^a$ | Shape parameter related to virus production after treatment<br>(after emergence of drug resistance )           | $\alpha_\lambda$        |
| $T_m$              | Maximum life span without therapy                                                                              | W(11.22,27.51)          |
| $\tau_m$           | Maximum Life expectancy after infection                                                                        | U[30,40] years          |
| $\tau_{50}^b$      | Drug sensitivity of combination therapy before emergence of drug resistance                                    | Table B                 |
| $\tau_{50}^a$      | Drug sensitivity of combination therapy after emergence of drug resistance                                     | $r \tau_{50}^b$         |
| $\eta^b$           | Drug efficacy of combination therapy before emergence of drug resistance                                       | U[0.8,1]                |
| $\eta^a$           | Drug efficacy of combination therapy after emergence of drug resistance                                        | Table B                 |
| $B_{CD4}$          | CD4 level when treatment initiated                                                                             | 500 or 350              |
| $T_t$              | Time to initiate treatment after infection                                                                     | Determined by $B_{CD4}$ |
| $T_r$              | Time of the emergence of drug resistance                                                                       | $T_t + r_t$             |
| $r_t$              | Resistance emergence rate                                                                                      | Exp(2),Exp(0.4482)      |

The values of parameters  $s, d, \delta, c$  are determined following the study of Tang et al. [1]. Parameters related to  $k(t)$  and  $\lambda(t)$  for the within-host model vary individually.

**Table B. Parameter values in situation 1 & 2**

| Parameters    | Situation 1       |                   | Situation 2       |                   |
|---------------|-------------------|-------------------|-------------------|-------------------|
|               | $B_{CD4} = 350$   | $B_{CD4} = 500$   | $B_{CD4} = 350$   | $B_{CD4} = 500$   |
| $l_1$         | $U(0.935, 0.940)$ | $U(0.935, 0.940)$ | $U(0.935, 0.940)$ | $U(0.935, 0.940)$ |
| $l_2$         | $U(0.935, 0.940)$ | $U(0.935, 0.940)$ | $U(1, 1)$         | $U(1, 1)$         |
| $\tau_{50}^b$ | $U(30, 50)$       | $U(20, 30)$       | $U(50, 60)$       | $U(20, 30)$       |
| $r$           | $U(2, 3)$         | $U(2, 3)$         | $U(4, 5)$         | $U(4, 5)$         |
| $\eta^a$      | $U(0.6, 0.8)$     | $U(0.6, 0.8)$     | $U(0.2, 0.5)$     | $U(0.2, 0.5)$     |
| $k_1$         | $U(0.2, 0.3)$     | $U(0.2, 0.3)$     | $U(0.2, 0.3)$     | $U(0.2, 0.3)$     |
| $k_2$         | $U(0.2, 0.3)$     | $U(0.3, 0.4)$     | $U(0.3, 0.4)$     | $U(0.8, 1)$       |

## References

1. Tang S, Xiao Y, Wang N, Wu H. Piecewise HIV virus dynamic model with CD4+ T cell count-guided therapy: I. J. Theor. Biol., 2012; 308, 123-134. doi: 10.1016/j.jtbi.2012.05.022. PMID: 22659043
